# Supplementary material
Source: PubMed Central journal article supplement (PMC8549078)
Supplement: NIHMS1738965-supplement-1.pdf [file NIHMS1738965-supplement-1.pdf]

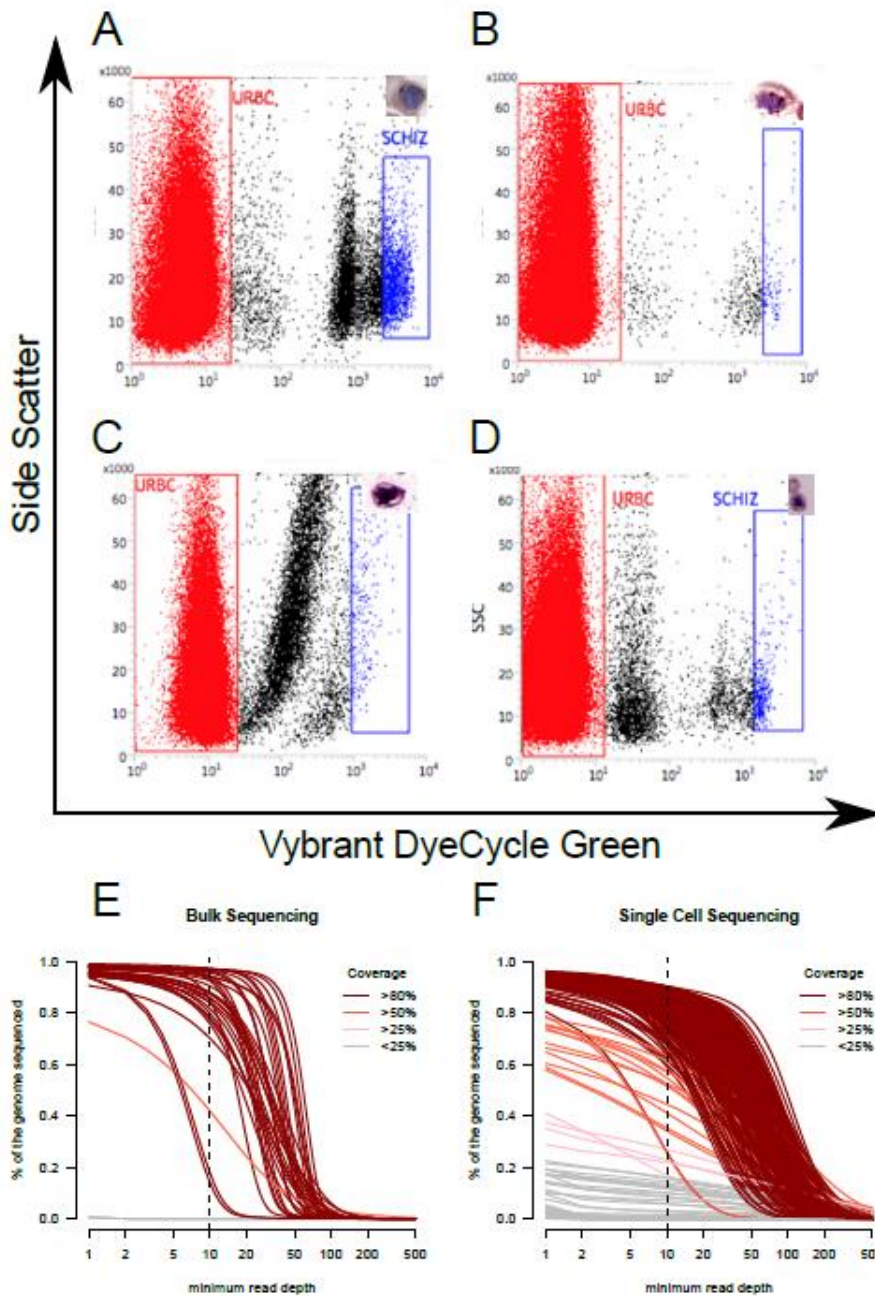

**Fig. S1. Flow sorting and sequencing of single cells, related to Figure 1.** (A-D) Representative FACS plots from four patient time points. FACS was performed after magnetic enrichment. Magnetic enrichment increases parasitaemia, and preferentially captures late stage parasites, however as they were present at high frequency in the infection there are substantial number of uninfected and early stage parasites remaining. In each plot the red box identifies uninfected red blood cells and the blue box represents the target cells for sorting. Read depth data from (E) bulk infections and (F) single cells. Each line shows the proportion of the genome covered by reads at increasing read depth thresholds. Data is colored by the proportion of the genome covered by at least 1X (legend).

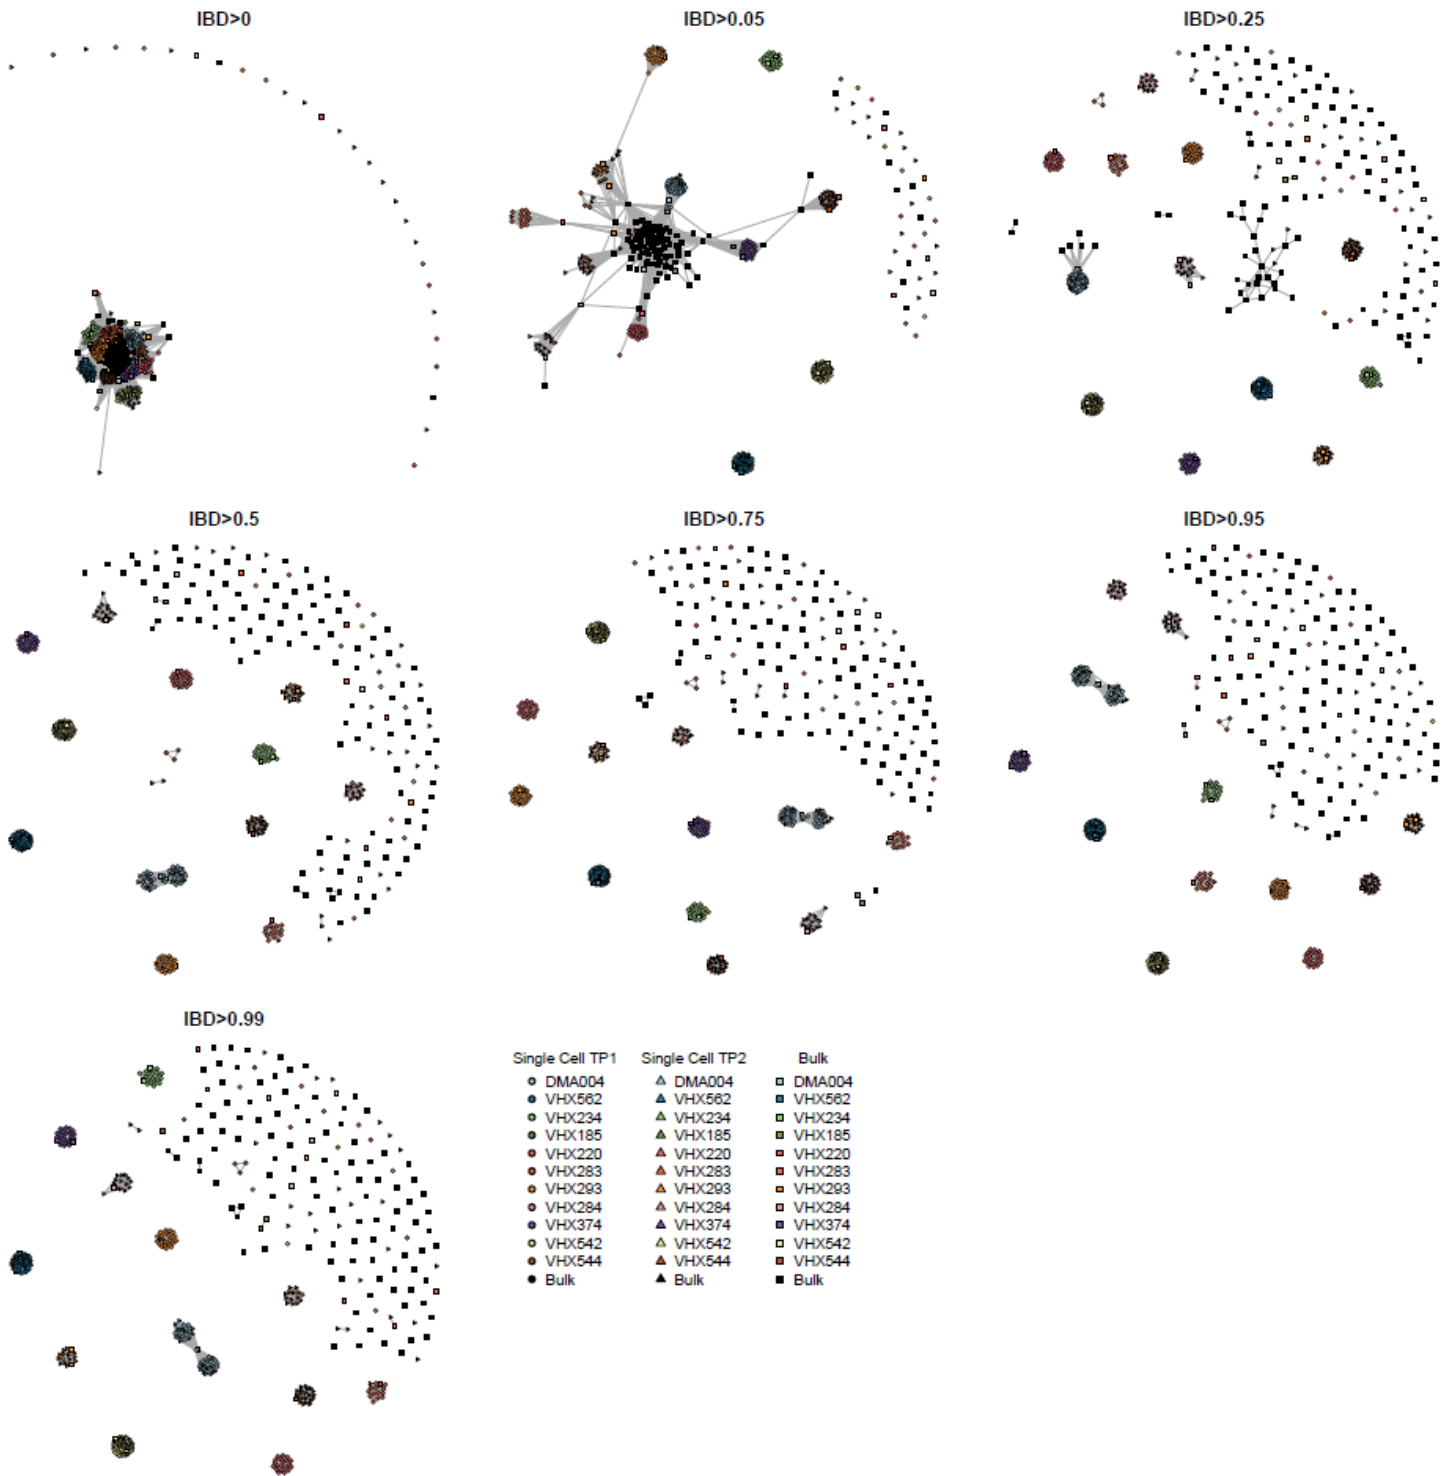

Fig. S2. Network analysis of identity by descent using progressive thresholds, related to Figure 2.

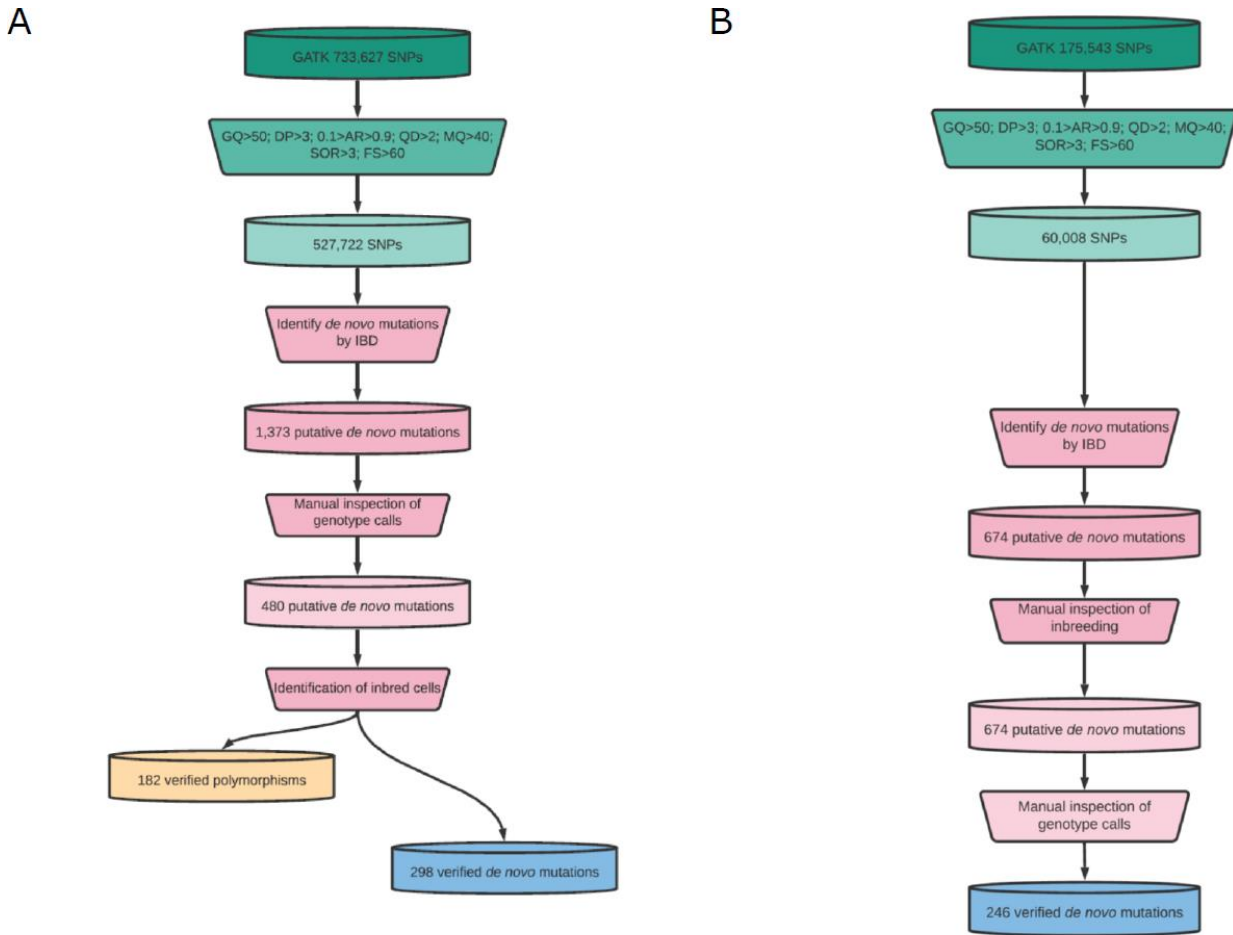

**Fig. S3. A flow chart depicting the identification and quality control of *de novo* SNPs identified in *P. vivax* infections (A) and *P. falciparum* infections (B), Related to STAR Methods.**

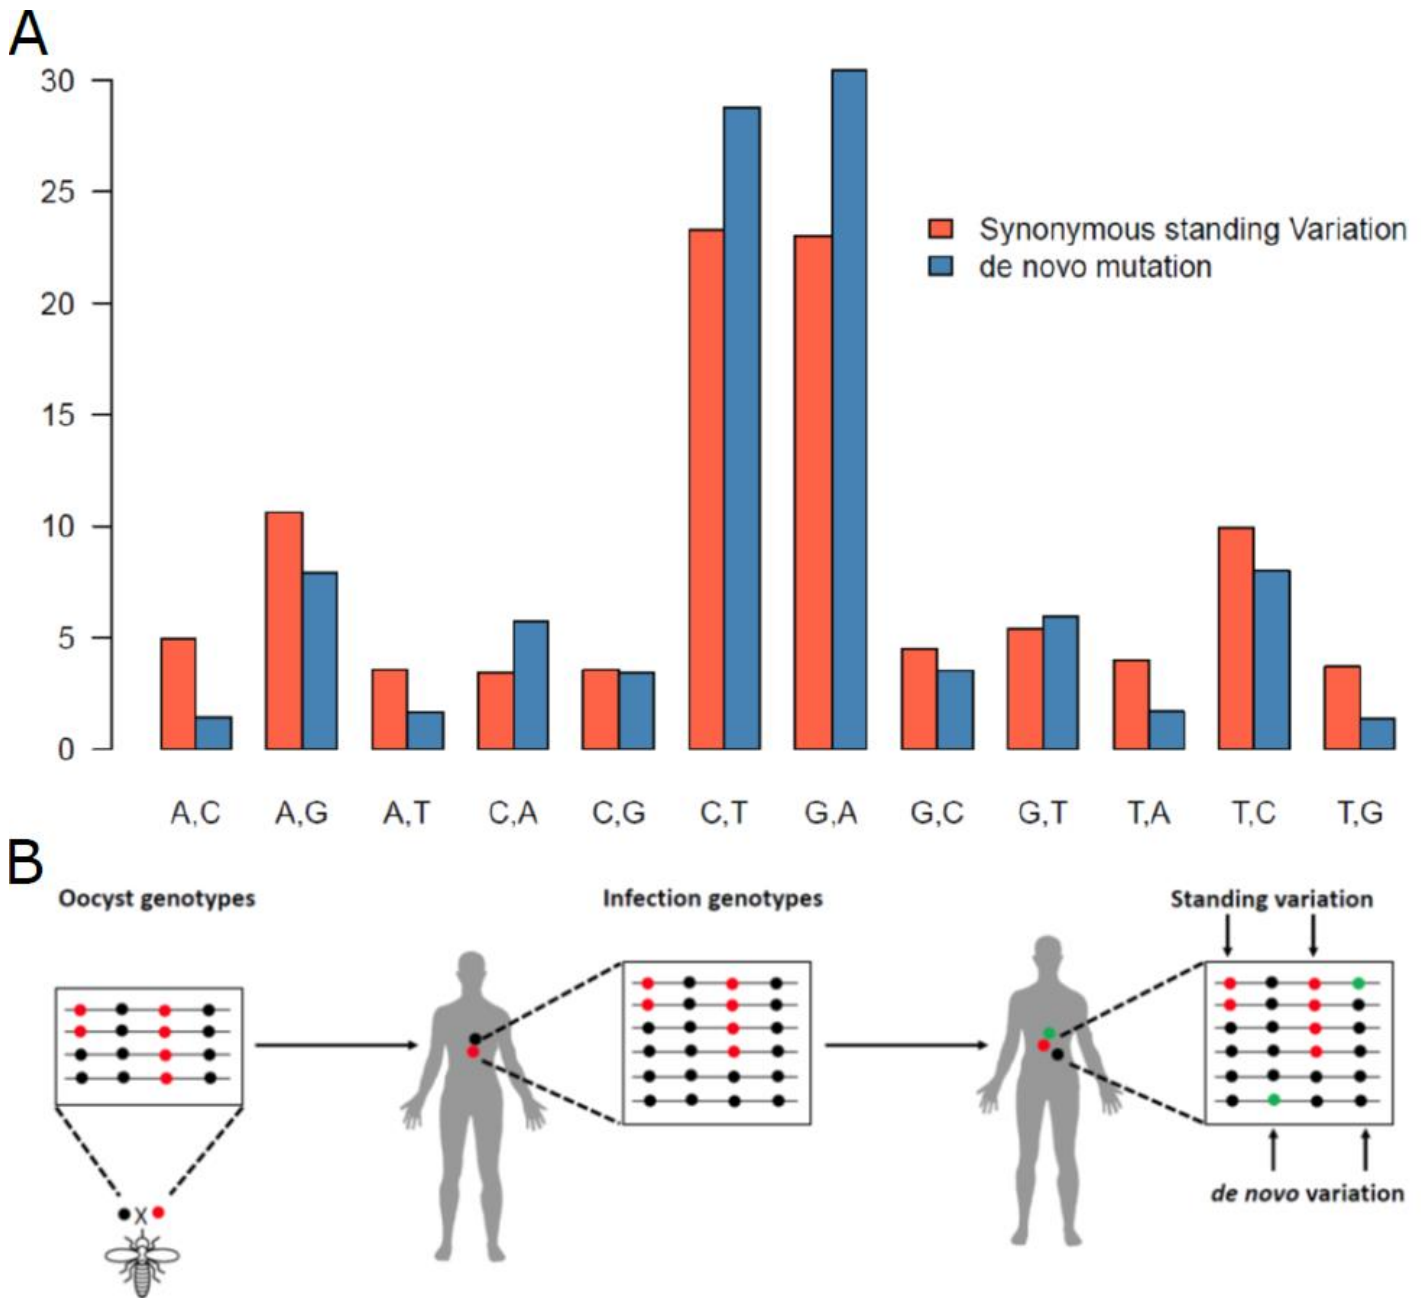

**Fig. S4. Identification of putative de novo mutations, related to STAR Methods and Figure 3.** Minimal bias in the ratio of different base pair changes supports low error rate from lysis induced mutations (A). We compared the difference between the distribution of mutational classes of synonymous mutation (which minimizes the impact of selection on the mutational process) to the mutations we identified as putative de novo mutations using a chi squared test ( $p=0.745$ ,  $\chi^2=7.6$ ,  $df=11$ ). A definition of standing and *de novo* variation (B).

# Visual Inspection of putative de novo mutations

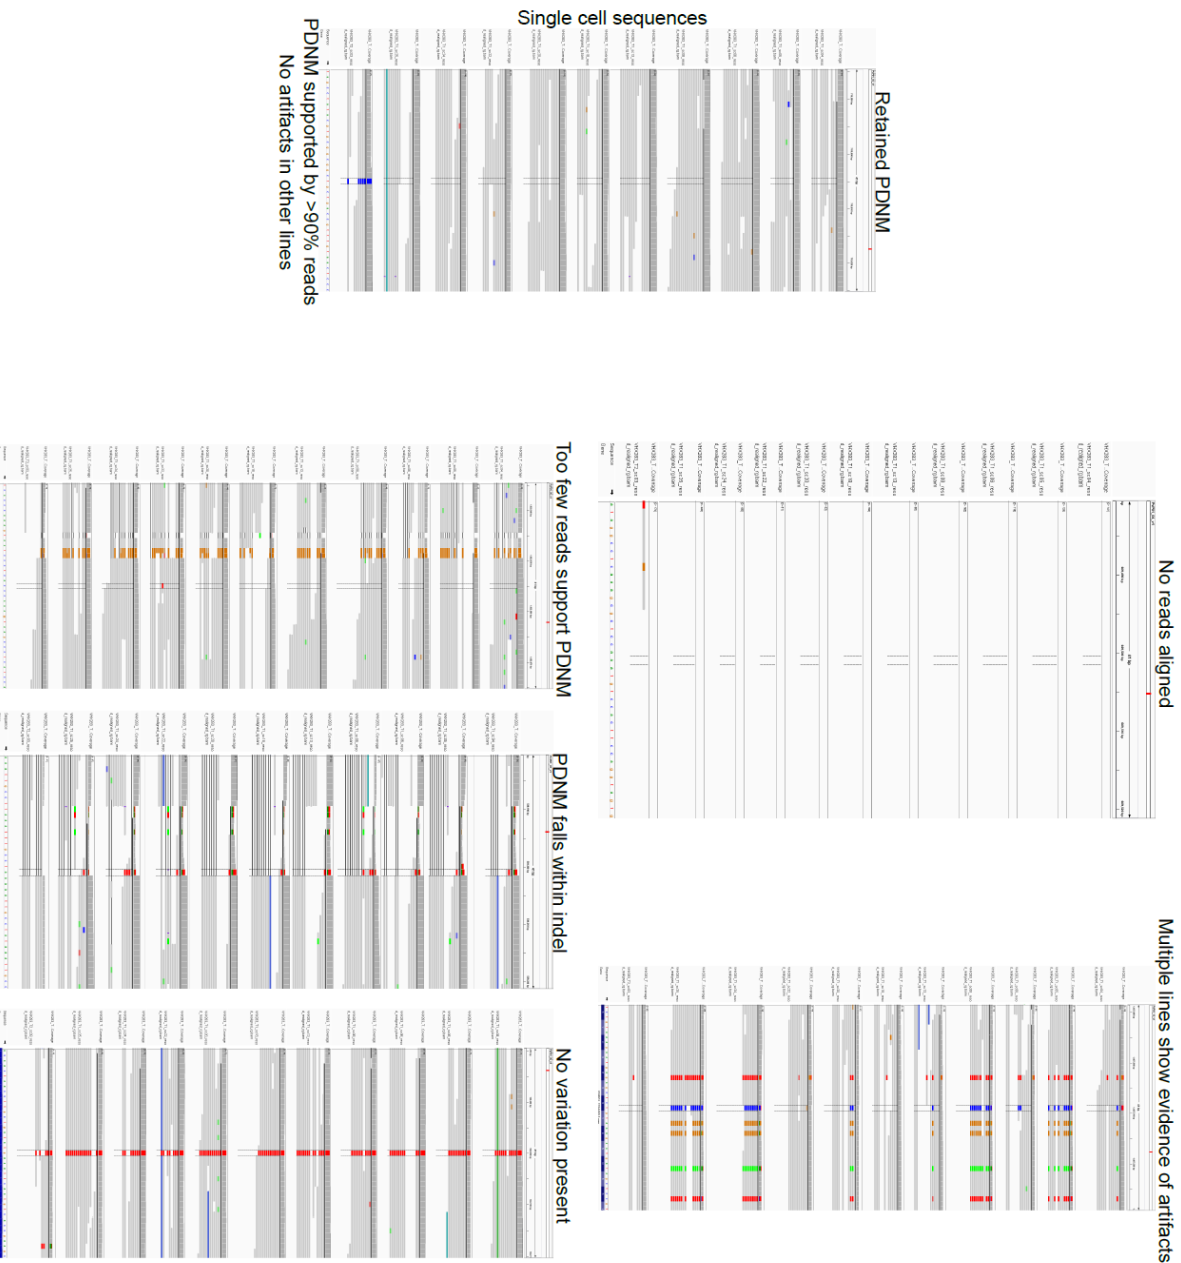

Fig S5. Examples of identification of errors in putative de novo mutations, related to STAR Methods.

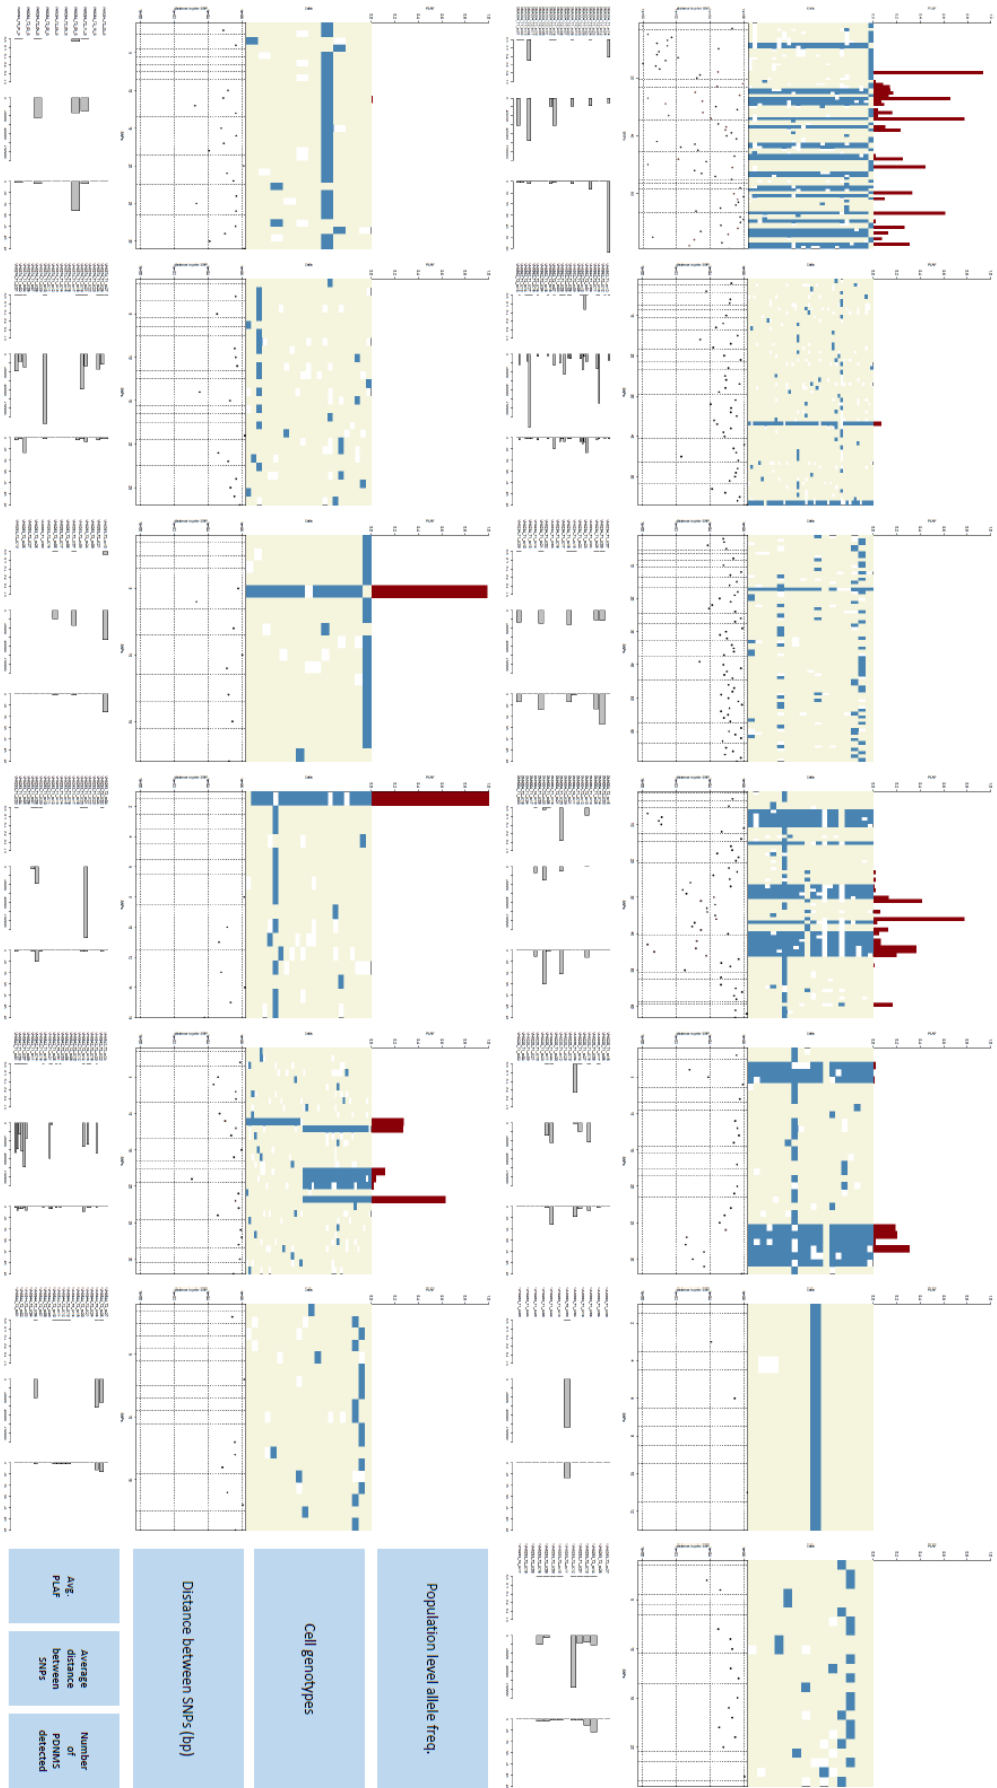

**Fig S6. Identification of inbreeding events in *P. vivax* single cell data, related to Figure 3.** The data depicted in each group of panels is shown in the lower right. For each group identified by IBD we show the population level allele frequency (PLAF) of the alternative allele (top), the genotype of each cell (second from top), the distance between consecutive PDMNs (third from top). The lowest group of panels show the average PLAF in PDMNs specific to the cell (lower left), the average distance between PDMNs specific to the cell (lower middle) and the number of PDMNs detected (lower right). The cell names are shown next to the lower group of panels. Cells with an average PLAF of  $>0$  or  $>30$  PDMNs detected were classified as likely driven by inbreeding, this was corroborated by examining the distribution of distance between PDMNs specific to the cell.

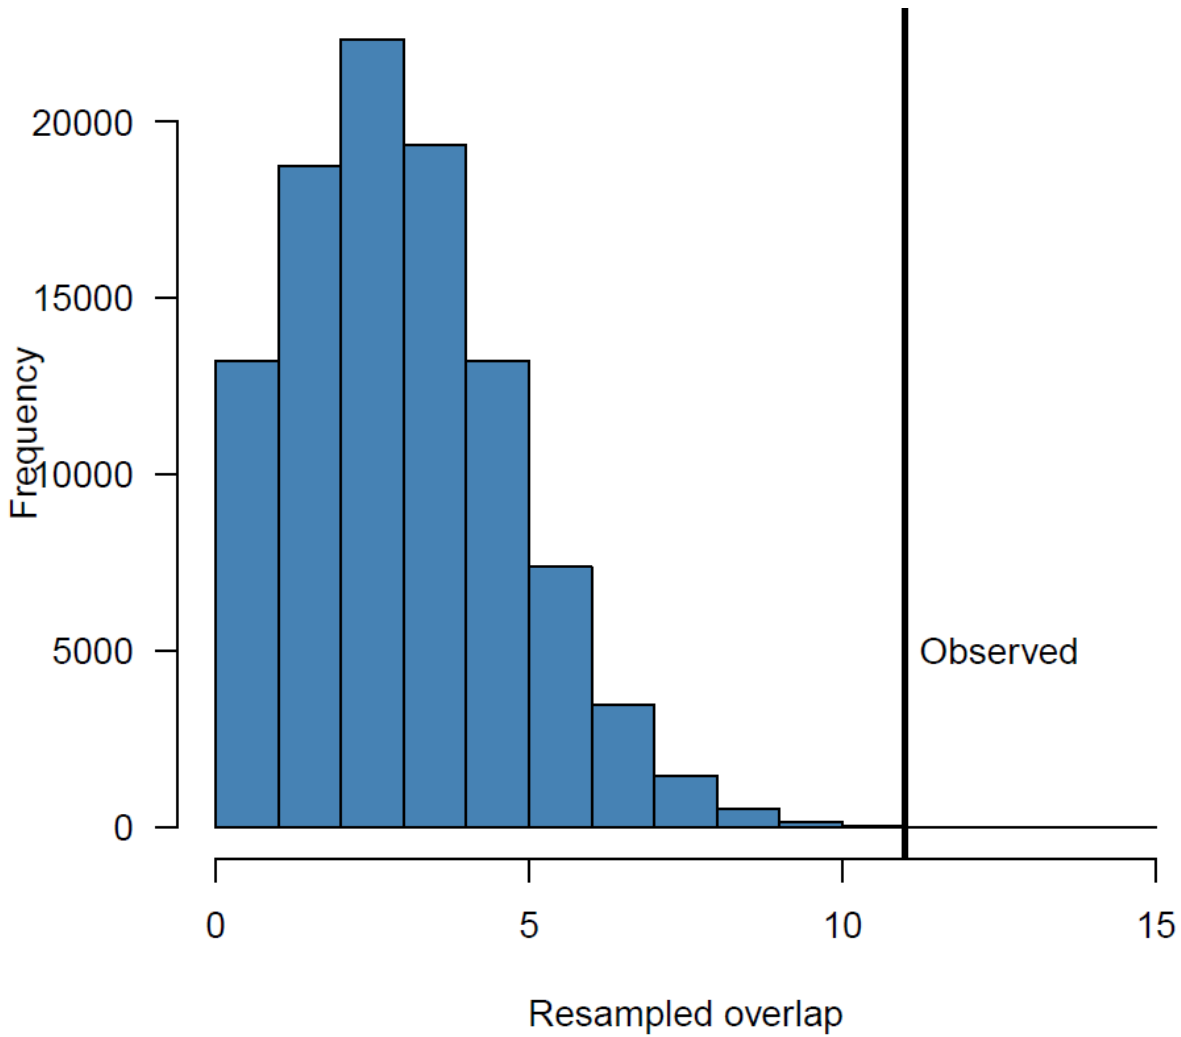

**Fig. S7. Bootstrap resampling of the distribution of overlapping genes expected when drawing orthologous genes bearing *de novo* mutations between *P. vivax* and *P. falciparum*, related to Table 2.**



| Study | Code | Date       | Days between events | Pregnant     | Primary          | Age | Sex | Location | pv1000/RBC | Bulk | Sorted RBCs | Single Cells |
|-------|------|------------|---------------------|--------------|------------------|-----|-----|----------|------------|------|-------------|--------------|
| VHX   | 185  | 6/25/2010  |                     | non-pregnant | primary inf      | 32  | UNK | MKT      | 7          | 1    | 0           | 0            |
| VHX   | 185  | 8/27/2010  | 63                  | non-pregnant | UNK              | 32  | UNK | MKT      | 5          | 1    | 0           | 0            |
| VHX   | 220  | 8/19/2010  |                     | non-pregnant | UNK              | 27  | F   | MKT      | 2          | 0    | 1           | 24           |
| VHX   | 220  | 10/21/2010 | 63                  | non-pregnant | UNK              | 25  | F   | MKT      | 2          | 0    | 1           | 24           |
| VHX   | 234  | 7/19/2010  |                     | non-pregnant | primary inf      | 42  | F   | Wangpa   | 2          | 1    | 1           | 21           |
| VHX   | 234  | 5/19/2011  | 304                 | non-pregnant | previous malaria | 42  | F   | Wangpa   | 2          | 0    | 0           | 0            |
| VHX   | 283  | 11/16/2010 |                     | non-pregnant | reinfection      | 4   | M   | Wangpa   | 4          | 1    | 1           | 24           |
| VHX   | 283  | 1/4/2011   | 49                  | non-pregnant | primary inf      | 4   | M   | Wangpa   | 2          | 1    | 1           | 24           |
| VHX   | 284  | 8/24/2010  |                     | non-pregnant | primary inf      | 27  | F   | Wangpa   | 3          | 1    | 0           | 6            |
| VHX   | 284  | 12/23/2010 | 121                 | non-pregnant | reinfection      | 27  | F   | Wangpa   | 10         | 1    | 0           | 23           |
| VHX   | 293  | 8/27/2010  |                     | non-pregnant | reinfection      | 15  | M   | Wangpa   | 3          | 1    | 1           | 24           |
| VHX   | 293  | 8/4/2011   | 342                 | non-pregnant | primary inf      | 15  | M   | Wangpa   | 5          | 1    | 1           | 22           |
| VHX   | 374  | 10/5/2010  |                     | non-pregnant | primary inf      | 20  | M   | Maela    | 2          | 1    | 1           | 24           |
| VHX   | 374  | 5/23/2011  | 230                 | non-pregnant | UNK              | 20  | M   | Maela    | 2          | 1    | 1           | 18           |
| VHX   | 542  | 7/6/2011   |                     | non-pregnant | primary inf      | 17  | M   | Maela    | 2          | 1    | 1           | 22           |
| VHX   | 542  | 9/16/2011  | 72                  | non-pregnant | UNK              | 17  | M   | Maela    | 8          | 1    | 1           | 24           |
| VHX   | 544  | 8/4/2011   |                     | non-pregnant | primary inf      | 11  | F   | MKT      | 3          | 0    | 1           | 9            |
| VHX   | 544  | 12/9/2011  | 127                 | non-pregnant | previous malaria | 11  | F   | MKT      | 2          | 1    | 1           | 21           |
| VHX   | 562  | 8/4/2011   |                     | non-pregnant | primary inf      | 13  | M   | MKK,PLU  | 2          | 1    | 1           | 22           |
| VHX   | 562  | 1/21/2012  | 170                 | non-pregnant | primary inf      | 13  | M   | MKK,PLU  | 5          | 1    | 1           | 24           |
| DMA   | 004  | 9/14/2010  |                     | pregnant     | reinfection      | 32  | F   | Wangpa   | 5          | 1    | 1           | 24           |
| DMA   | 004  | 10/13/2010 | 29                  | pregnant     | reinfection      | 32  | F   | Wangpa   | 2          | 1    | 1           | 24           |

**Table S1. Information on the patients and infections sampled in this study, related to STAR Methods.**

| Identifier                 | p-value  | FDR corrected p value | Pathway                                                                                       | pathway_source_id |
|----------------------------|----------|-----------------------|-----------------------------------------------------------------------------------------------|-------------------|
| GO:0001522                 | 3.00E-03 | 0.00072               | pseudouridine synthesis                                                                       | GO                |
| LIPA-CORESYPN-PWY          | 0.00021  | 0.001575              | Lipid A-core biosynthesis                                                                     | MetaCyc           |
| PWY-5469                   | 0.00018  | 0.001575              | sesamin biosynthesis                                                                          | MetaCyc           |
| PWY-7250                   | 0.00032  | 0.0016                | 2Fe-2Siron-sulfur cluster biosynthesis                                                        | MetaCyc           |
| ec00231                    | 0.00142  | 0.005325              | Puromycin biosynthesis                                                                        | KEGG              |
| PWY-7650                   | 0.00196  | 0.00588               | echinocandin B biosynthesis                                                                   | MetaCyc           |
| COA-PWY-1                  | 0.0032   | 0.008                 | coenzyme A biosynthesis II (mammalian)                                                        | MetaCyc           |
| ec00230                    | 0.00465  | 0.00845               | Purine metabolism                                                                             | KEGG              |
| PWY-7559                   | 0.00507  | 0.00845               | glutathione degradation (DUG pathway - yeast)                                                 | MetaCyc           |
| CYCLOHEXANOL-OXIDATION-PWY | 0.00416  | 0.00845               | cyclohexanol degradation anaerobic aromatic compound degradation ( <i>Thauera aromatica</i> ) | MetaCyc           |
| BENZCOA-PWY                | 0.00565  | 0.008475              | homolactic fermentation                                                                       | MetaCyc           |
| ANAEROFrucAT-PWY           | 0.00847  | 0.01155               | phytate degradation I                                                                         | MetaCyc           |
| PWY-4702                   | 0.01169  | 0.0146125             | protein phosphoylation                                                                        | GO                |
| GO:0006468                 | 0.00297  | 0.02784               | integral component of membrane                                                                | GO                |
| GO:0016021                 | 0.00348  | 0.02784               |                                                                                               |                   |

**Table S4. Pathway and GO term enrichment of *de novo* mutations, related to Table 2.**

| Patient | Days | Months | Unrelated | Clonal | Related and Unrelated | All Related | pop. prob. Reinfection (Taylor et al) |
|---------|------|--------|-----------|--------|-----------------------|-------------|---------------------------------------|
| DMA004  | 29   | 0.97   |           |        |                       | Y           | 0                                     |
| VHX283  | 49   | 1.63   |           |        | Y                     |             | 0.05                                  |
| VHX185  | 63   | 2.1    | NA        | NA     | NA                    | NA          | 0.06                                  |
| VHX220  | 63   | 2.1    |           |        | Y                     |             | 0.06                                  |
| VHX542  | 72   | 2.4    |           | Y      |                       |             | 0.07                                  |
| VHX284  | 121  | 4.03   |           |        |                       | Y           | 0.1                                   |
| VHX544  | 127  | 4.23   |           |        | Y                     |             | 0.11                                  |
| VHX562  | 170  | 5.67   |           | Y      |                       |             | 0.13                                  |
| VHX374  | 230  | 7.67   |           |        | Y                     |             | 0.15                                  |
| VHX234  | 304  | 10.13  | NA        | NA     | NA                    | NA          | 0.2                                   |
| VHX293  | 342  | 11.4   |           |        | Y                     |             | 0.25                                  |

**Table S5. Comparison between the IBD patterns within infections and estimates the subsequent infection was due to reinfection using microsatellite data from Taylor *et al*, related to Figure 2.**
